# Supplementary material for: No Evidence for Retinal Damage Evolving from Reduced Retinal Blood Flow in Carotid Artery Disease
Source: PubMed Central journal article supplement (PMC4628976; doi:10.1155/2015/604028), 2015-10-19
Supplement: 604028.f1.pdf [file 604028.f1.pdf]

# **No Evidence for Retinal Damage Evolving from Reduced Retinal Blood Flow in Carotid Artery Disease**

Henning Heßler<sup>1</sup>, Hanna Zimmermann<sup>1</sup>, Timm Oberwahrenbrock<sup>1</sup>, Ella Maria Kadas<sup>1</sup>, Janine Mikolajczak<sup>1</sup>, Alexander U. Brandt<sup>1</sup>, Andreas Kauert<sup>2</sup>, Friedemann Paul<sup>1, 3</sup>, Stephan J. Schreiber<sup>3</sup>

1) NeuroCure Clinical Research Center, Charité - Universitätsmedizin Berlin, Germany

2) Department of Neurology, Evangelisches Krankenhaus Königin Elisabeth Herzberge Berlin, Germany

3) Department of Neurology, Charité - Universitätsmedizin Berlin, Germany

## **Supplementary Figures**

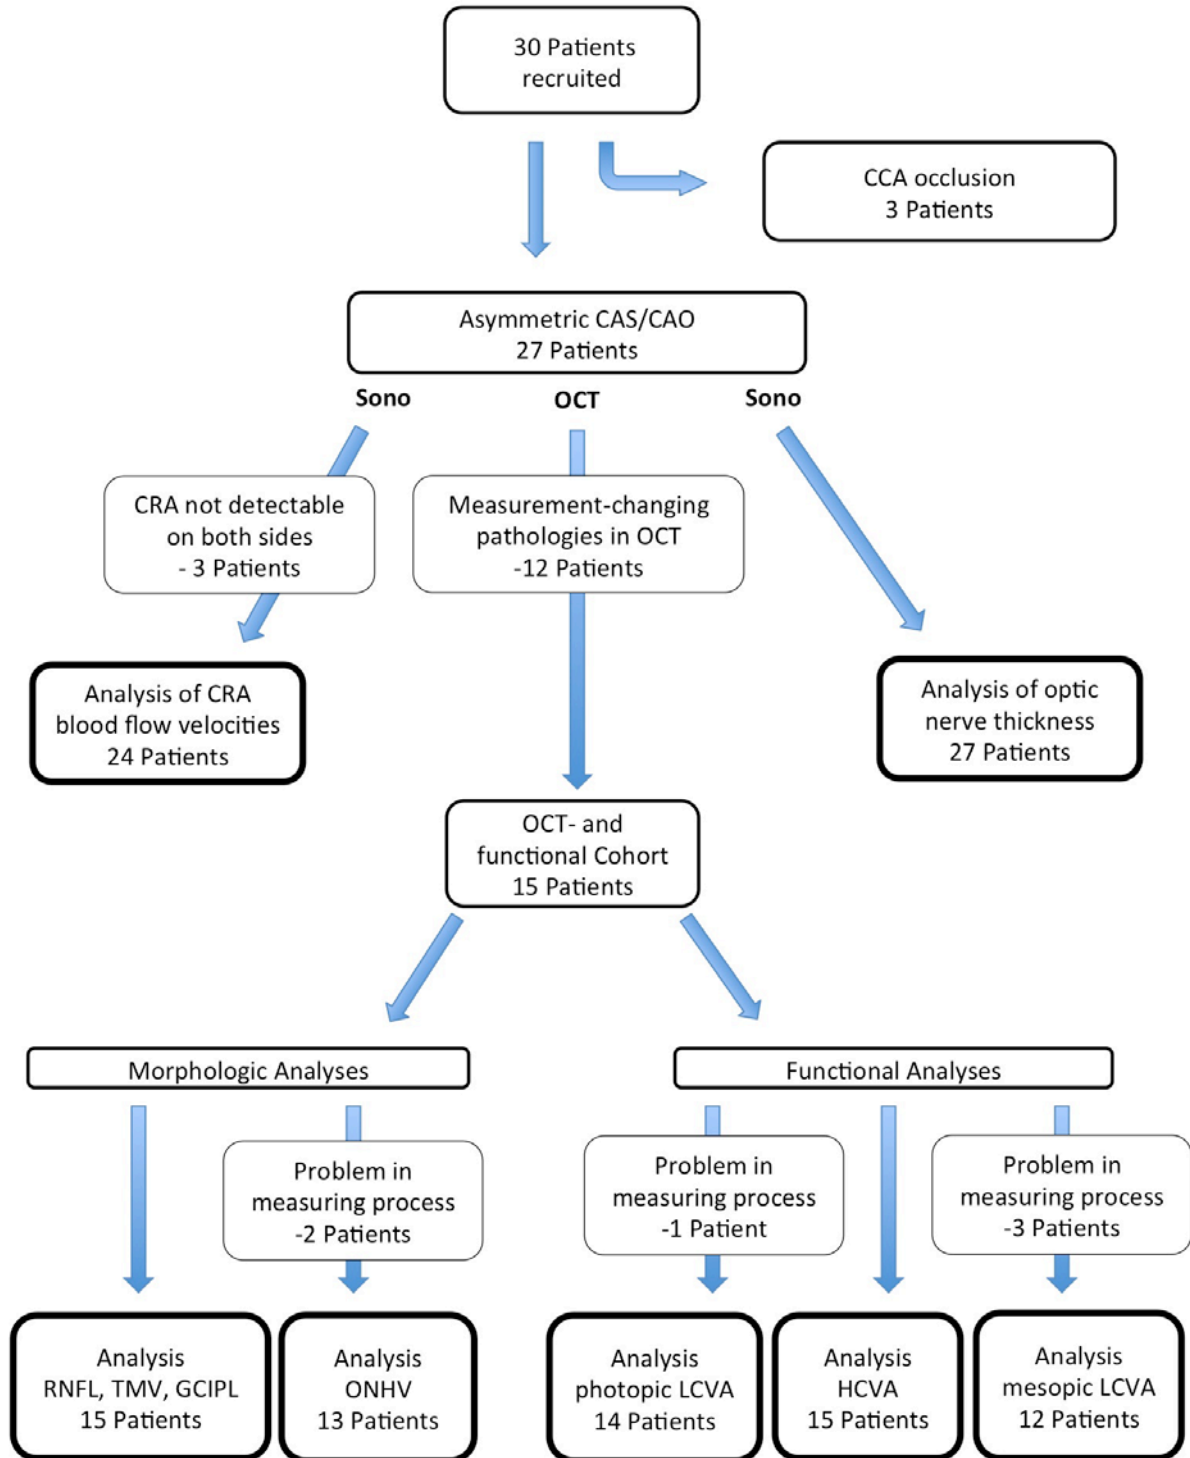

**Supplementary-Figure 1:** Flowchart of different patient cohorts. *CAD* carotid artery disease, *CAS* carotid artery stenosis, *CAO* carotid artery occlusion, *CCA* common carotid artery, *CRA* central retinal artery, *OCT* optical coherence tomography, *RNFL* global retinal nerve fiber layer thickness, *TMV* total macular volume, *GCIPL* ganglion cell / inner plexiform layer, *ONHV* optic nerve head volume, *HCVA* high contrast visual acuity, *LCVA* low contrast visual acuity (photopic=85 cd/m<sup>2</sup>, mesopic=3 cd/m<sup>2</sup>).

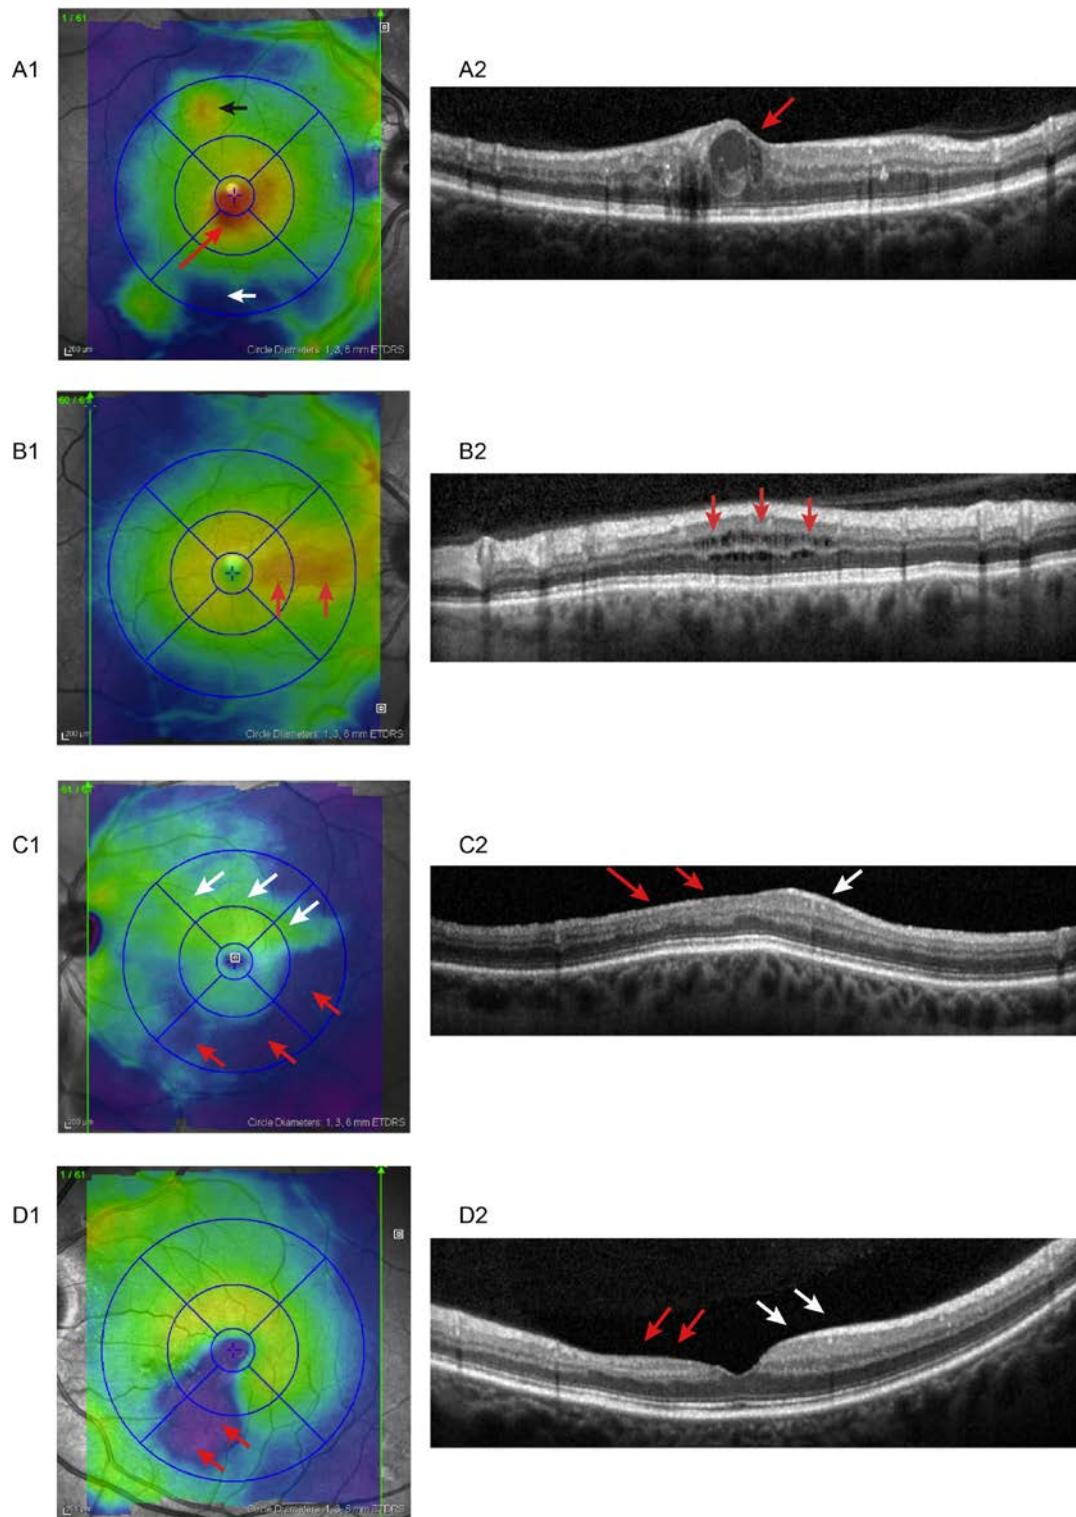

**Supplementary-Figure 2:** OCT macular thickness maps and cross-sectional images of retinal pathologies with measurement-changing extent. Patient **A** showed unknown diabetic macular edema on both sides. **A1** presents local thickenings (black arrow) and local thinning (white arrow) next to pronounced macular edema (red arrow in **A1** and **A2**), which can be seen in the corresponding B-Scan **A2**. Patient **B** presented a pronounced intraretinal edema resulting in a vitreoretinal traction-syndrome. **B1** shows a strung out thickening (red arrows) in the area between macula and papilla, **B2** shows the corresponding B-Scan. The retina seems lifted, an intraretinal edema has occurred (red arrows). Patient **C** presented a focal atrophy on the CAS/CAO side, which is compatible to a retinal artery branch occlusion. **C1** shows a thinning in the inferior retinal quadrants (red arrows) in comparison to the normal configuration of the retinal thickness (white arrows). **C2** the corresponding B-scan shows a thinning of

the upper retinal layers (red arrows) compared to the normal retinal configuration (white arrow). Patient **D** presented a focal atrophy on the no-CAD side. **D1** shows the well-defined atrophic area (red arrows), **D2** the corresponding B-Scan: the upper retinal layers are atrophic (red arrows) compared to the normal retinal configuration.
